# Supplementary material for: Rapid Increase in frequency of gene copy-number variants during experimental evolution in Caenorhabditis elegans
Source: PubMed Central journal article supplement (PMC4673709; doi:10.1186/s12864-015-2253-2), 2015-12-09
Supplement: 12864_2015_2253_MOESM2_ESM.pdf [file 12864_2015_2253_MOESM2_ESM.pdf]

## **Additional File 2: Supplemental Data S2**

List of ORFs contained in 25 deletions detected by oaCGH in five control and 25 adaptive recovery experimental *C. elegans* lines following 180-212 generations of population expansion under competitive conditions. The deletions are listed in Table 2. Deletion breakpoint coordinates and ORFs contained therein are based on Wormbase version WS243.

### ***Deletion in 16A\****

Chr X:817,573..830,086

Size = 12,514 bp

1 protein-coding genes:

daf-3 (F25E2.5)

### ***Deletion in 16D\****

Chr V:7,663,133..7,687,447

Size = 24,315 bp

7 protein-coding genes:

C12D5.5, C12D5.4, C12D5.3, *cyp-33A1* (C12D5.7), *sre-11* (C12D5.11), *nhr-94* (C12D5.8), *nhr-152* (C12D5.2) (partial deletion)

### ***Deletion in 19A\****

Chr X:800,773..827,100

Size = 26,328 bp

5 protein-coding genes:

*gtr-1* (F25E2.1), F25E2.2, F25E2.3, *ifd-2* (F25E2.4), *daf-3* (F25E2.5)

### ***Deletion in 19C:***

Chr V:7,642,395..7,682,740

Size = 40,346 bp

10 protein-coding genes:

F07C4.11, *str-47* (F07C4.1), F07C4.12, *srh-234* (F07C4.14), *srh-200* (F07C4.13), C12D5.5, C12D5.4, C12D5.3, *cyp-33A1* (C12D5.7), *sre-11* (C12D5.11)

### ***Deletion in 19E:***

Chr X:821,499..829,454

Size = 7,956 bp

1 protein-coding genes:

*daf-3* (F25E2.5) (partial deletion)

### ***Deletion in 50B:***

Chr V:7,650,284..7,693,435

Size = 43,152 bp

12 protein-coding genes:

F07C4.12 (partial deletion), *srh-234* (F07C4.14), *srh-200* (F07C4.13), C12D5.5, C12D5.4, C12D5.3, *cyp-33A1* (C12D5.7), *sre-11* (C12D5.11), *nhr-94* (C12D5.8), *nhr-152* (C12D5.2), C12D5.9, C12D5.10

1 Pseudogene:

*str-147* (C12D5.1)

***Deletion in 50C:***

Chr V: 7,647,125..7,696,096

Size = 48,972 bp

14 protein-coding genes:

*str-47* (F07C4.1), F07C4.12, *srh-234* (F07C4.14), *srh-200* (F07C4.13), C12D5.5, C12D5.4, C12D5.3, *cyp-33A1* (C12D5.7), *sre-11* (C12D5.11), *nhr-94* (C12D5.8), *nhr-152* (C12D5.2), C12D5.9, C12D5.10, ZK105.3 (partial deletion)

1 Pseudogene:

*str-147* (C12D5.1)

***Deletion in 50C:***

Chr X: 1,029..273,082

Size = 272,054 bp

35 protein-coding genes:

CE7X\_3.1, Y73B3A.1, Y73B3A.20, Y73B3A.18, Y73B3A.3, Y73B3A.4, *elk-2* (Y73B3A.5), *fbxa-221* (Y73B3A.15), *fbxa-222* (Y73B3A.22), *fbxa-16* (Y73B3A.14), Y73B3A.13, Y73B3A.7, *cal-6* (Y73B3A.12), Y73B3A.8, Y73B3A.11, Y73B3A.9, Y73B3A.10, T08D2.1, T08D2.4, T08D2.5, T08D2.6, T08D2.7, T08D2.8, Y73B3B.1, Y73B3B.3, *set-28* (Y73B3B.2), AC8.4, AC8.3, AC8.7, AC8.11, AC8.10, AC8.12, *set-33* (Y108F1.3), *math-43* (Y108F1.4), Y108F1.5 (partial deletion)

18 Pseudogenes:

cTel7X.1, CE7X\_3.2, CE7X\_3.4, Y35H6.3, Y73B3A.21, Y73B3A.2, Y73B3A.17, Y73B3A.16, Y73B3A.t1, T08D2.9, T08D2.2, T08D2.3, Y73B3B.5, AC8.6, AC8.5, AC8.9, pme-6 (AC8.1), AC8.2

***Deletion in 50D\*:***

Chr V: 7,653,667..7,680,465

Size = 26,799 bp

6 protein-coding genes:

*srh-234* (F07C4.14) (partial deletion), *srh-200* (F07C4.13), C12D5.5, C12D5.4, C12D5.3, *cyp-33A1* (C12D5.7) (partial deletion)

***Deletion in 50D:***

Chr X: 1,029..295,671

Size = 294,643 bp

38 protein-coding genes:

CE7X\_3.1, Y73B3A.1, Y73B3A.20, Y73B3A.18, Y73B3A.16, Y73B3A.3, Y73B3A.4, *elk-2* (Y73B3A.5), *fbxa-221* (Y73B3A.15), *fbxa-222* (Y73B3A.22), *fbxa-16* (Y73B3A.14), Y73B3A.13, Y73B3A.7, *cal-6* (Y73B3A.12), Y73B3A.8, Y73B3A.11, Y73B3A.9, Y73B3A.10, T08D2.1, T08D2.4, T08D2.5, T08D2.6,

T08D2.7, T08D2.8, Y73B3B.1, Y73B3B.3, *set-28* (Y73B3B.2), AC8.4, AC8.3, AC8.7, AC8.11, AC8.10, AC8.12, *set-33* (Y108F1.3), *math-43* (Y108F1.4), Y108F1.5, Y108F1.1, Y47C4A.1

20 Pseudogenes:

cTel7X.1, CE7X\_3.2, CE7X\_3.4, Y35H6.3, Y73B3A.21, Y73B3A.2, Y73B3A.17, Y73B3A.16, Y73B3A.t1, T08D2.9, T08D2.2, T08D2.3, Y73B3B.5, AC8.6, AC8.5, AC8.9, *pme-6* (AC8.1), AC8.2, Y47C4A.t1, Y47C4A.t2

***Deletion in 50E\*:***

Chr V:7,652,044..7,682,914

Size = 30,871 bp

8 protein-coding genes:

F07C4.12B (partial deletion), *srh-234* (F07C4.14), *srh-200* (F07C4.13), C12D5.5, C12D5.4, C12D5.3, *cyp-33A1* (C12D5.7), *sre-11* (C12D5.11) (partial deletion)

***Deletion in 66B:***

Chr V:15,258,727..15,326,180

Size = 67,454 bp

26 protein-coding genes:

*srsx-37* (M01B2.7), M01B2.8, M01B2.10, M01B2.12, M01B2.13, T10H4.13, *srw-22* (T10H4.3), T10H4.4, *srw-16* (T10H4.5), *srw-17* (T10H4.6), *srw-19* (T10H4.8), *srx-51* (T10H4.9), *cyp-34A1* (T10H4.10), *cyp-34A2* (T10H4.11), *str-96* (T10H4.2), *cpr-3* (T10H4.12), *srx-48* (T26H8.2), T26H8.5, T26H8.4, *srz-10* (ZK1037.11), *irld-62* (ZK1037.1), *srt-22* (ZK1037.3), *nhr-246* (ZK1037.4), ZK1037.13, *nhr-247* (ZK1037.5), ZK1037.6 (partial deletion)

5 Pseudogenes:

*srw-18* (T10H4.7), T10H4.1, *srx-49* (T26H8.3), ZK1037.12, ZK1037.2

***Deletion in 66B\*:***

Chr X:9,983,441..9,999,107

Size = 15,667 bp

2 protein-coding genes:

F19C6.5, *grk-1* (F19C6.1) (partial deletion)

***Deletion in 66D:***

Chr V:18,665,661..18,670,354

Size = 4,694 bp

1 protein-coding gene:

Y69H2.10 (partial deletion)

***Deletion in 66D:***

Chr V:18,701,820..18,725,404

Size = 23,585 bp

3 protein-coding genes:

*nhr-241* (Y69H2.8) (partial deletion), Y69H2.9, Y17D7C.1, Y17D7C.6, Y17D7C.2

5 Pseudogenes:

Y69H2.18, Y69H2.16, Y17D7C.5, Y17D7C.4, Y17D7C.3

***Deletion in 66D:***

Chr X:961,361..963,014

Size = 1,654 bp

1 protein-coding gene:

*ncs-1* (C44C1.3) (partial deletion)

***Deletion in 66D:***

Chr X:7,528,608..7,529,729

Size = 1,122 bp

1 protein-coding gene:

*ceh-14* (F46C8.5) (partial deletion)

***Deletion in 66E:***

Chr X:7,528,608..7,529,729

Size = 1,122 bp

1 protein-coding gene:

*ceh-14* (F46C8.5) (partial deletion)

***Deletion in C1:***

Chr I:15,060,622..15,071,438

Size = 10,817 bp

0 protein-coding genes

4 rRNA genes:

F31C3.7, F31C3.11, F31C3.9, F31C3.8

1 Pseudogene:

*rrn-3.56* (F31C3.10)

***Deletion in C2:***

Chr I:15,060,388..15,071,427

Size = 11,040 bp

0 protein-coding genes

4 rRNA genes:

F31C3.7, F31C3.11, F31C3.9, F31C3.8

1 Pseudogene:

*rrn-3.56* (F31C3.10)

***Deletion in C3:***

Chr II:14,034,460..14,039,471

Size = 5,012 bp

1 protein-coding gene:

*daf-5* (W01G7.1) (partial deletion)

***Deletion in C3\*:***

Chr X:7,527,813..7,529,236

Size = 1,424 bp

1 protein-coding gene:

*ceh-14* (F46C8.5) (partial deletion)

***Deletion in C4:***

Chr I:15,060,388..15,071,427

Size = 11,040 bp

0 protein-coding genes

4 rRNA genes:

F31C3.7, F31C3.11, F31C3.9, F31C3.8

1 Pseudogene:

*rrn-3.56* (F31C3.10)

***Deletion in C5:***

Chr I:15,061,973..15,071,438

Size = 9,466 bp

0 protein-coding genes

4 rRNA genes:

F31C3.7, F31C3.11, F31C3.9, F31C3.8

***Deletion in C5:***

Chr X:823,167..827,286

Size = 4,120 bp

1 protein-coding gene:

*daf-3* (F25E2.5) (partial deletion)
