# Supplementary material for: Rapid Increase in frequency of gene copy-number variants during experimental evolution in Caenorhabditis elegans
Source: PubMed Central journal article supplement (PMC4673709; doi:10.1186/s12864-015-2253-2), 2015-12-09
Supplement: 12864_2015_2253_MOESM4_ESM.pdf [file 12864_2015_2253_MOESM4_ESM.pdf]

**Additional File 4: Suppl Figure S2**

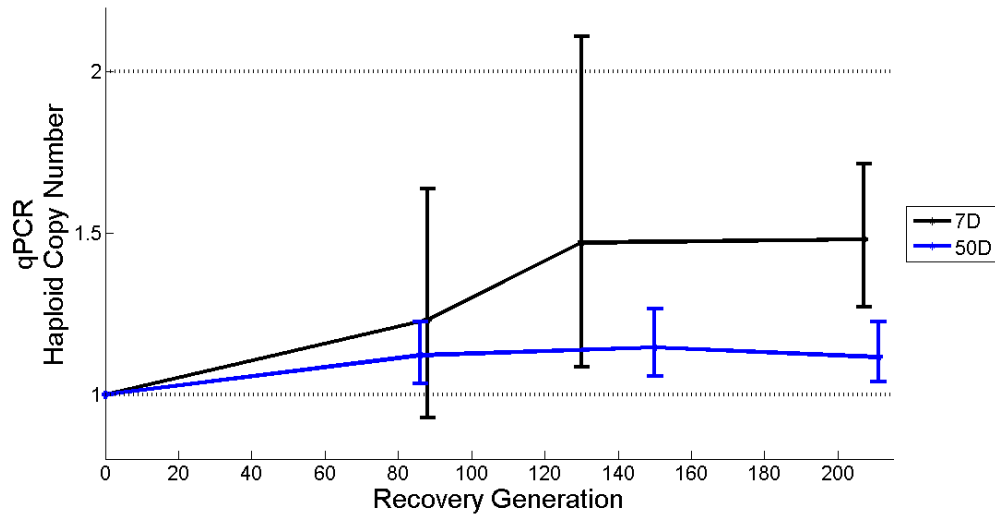

**Supplemental Figure S2.** Increase in the frequency of parallel duplication events in two populations containing an overlapping region on Chromosome IV. The average copy-number per haploid genome was calculated from qPCR results and is indicated on the vertical axis. The number of recovery generations is indicated on the horizontal axis.
