# Supplementary material for: Rapid Increase in frequency of gene copy-number variants during experimental evolution in Caenorhabditis elegans
Source: PubMed Central journal article supplement (PMC4673709; doi:10.1186/s12864-015-2253-2), 2015-12-09
Supplement: 12864_2015_2253_MOESM8_ESM.pdf [file 12864_2015_2253_MOESM8_ESM.pdf]

**Additional File 8: Suppl Figure S6**

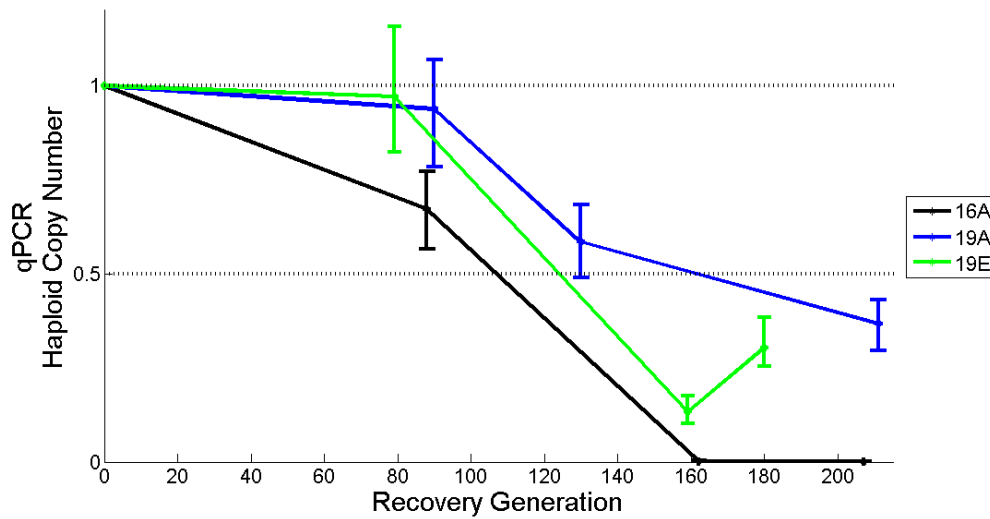

**Supplemental Figure S6.** Increase in the frequencies of parallel deletion events in three adaptive recovery populations (16A, 19A, and 19E), containing an overlapping region on Chromosome X. The average copy-number per haploid genome was calculated from qPCR results and is indicated on the vertical axis. The number of recovery generations is indicated on the horizontal axis. The results show a strong decline in average copy-number of these three independent deletions that were initially detected by oaCGH. The deletions have reached fixation when the average copy-number has reached 0.
