# Supplementary material for: Rapid Increase in frequency of gene copy-number variants during experimental evolution in Caenorhabditis elegans
Source: PubMed Central journal article supplement (PMC4673709; doi:10.1186/s12864-015-2253-2), 2015-12-09
Supplement: 12864_2015_2253_MOESM11_ESM.pdf [file 12864_2015_2253_MOESM11_ESM.pdf]

## **Additional File 11: Supplemental Data S3**

List of ORFs contained in eight overlapping duplications and deletions in experimental *C. elegans* lines following 180-212 generations of population expansion under competitive conditions. Duplication/deletion breakpoint coordinates and ORFs contained therein are based on Wormbase version WS243.

### **Overlapping Duplications:**

#### 1. Chromosome II:

16D: 6,248,049..6,406,772

50E: 6,312,598..6,444,674

Overlapping region: 6,312,598-6,406,772 = 94,175 bp

26 protein-coding ORFs

C32D5.3

Biological process: apoptotic process; embryo development ending in birth or egg hatching; receptor mediated reproduction

C32D5.4

Unclassified

*sma-6* (C32D5.2)

Biological process: BMP signaling pathway; body morphogenesis; dauer larval development; defense response to fungus; innate immune response; maintenance of protein location in nucleus; positive regulation of multicellular organism growth; positive regulation of protein catabolic process; positive regulation of transcription from RNA polymerase II promoter; protein phosphorylation; regulation of cell adhesion; regulation of cell morphogenesis; reproduction; tail tip morphogenesis  
Cellular component: membrane; plasma membrane  
Molecular functions: ATP binding; BMP binding; protein kinase activity; transforming growth factor beta-activated receptor activity; transmembrane receptor protein serine/threonine kinase activity

*set-4* (C32D5.5)

Biological process: determination of adult lifespan; embryo development ending in birth or egg-hatching

Molecular functions: protein binding

C32D5.6

Biological process: cellular response to DNA damage stimulus

Molecular functions: protein binding

C32D5.14

Unclassified

C32D5.7

Unclassified

C32D5.8

Biological process: embryo development ending in birth or egg-

hatching

C32D5.1  
 Unclassified  
*lgg-1* (C32D5.9)  
 Biological process: autophagy; dauer larval development; determination of adult lifespan; embryo development; embryo development ending in birth or egg-hatching; growth; necrotic cell death; positive regulation of necrotic cell death; programmed cell death  
 Cellular component: autophagic vacuole; autophagic vacuole membrane; cytoplasm; nucleus

C32D5.10  
 Biological process: nematode larval development; reproduction  
 Molecular function: metal ion binding; protein binding; zinc ion binding

C32D5.11  
 Biological process: apoptotic process; lipid storage  
 Molecular function: protein binding; zinc ion binding

C32D5.12  
 Biological process: body morphogenesis; embryo development ending in birth or egg-hatching; locomotion; nematode larval development; oxidation-reduction process; steroid biosynthetic process  
 Molecular function: 3-beta-hydroxy-delta5-steroid dehydrogenase activity; oxidoreductase activity, acting on the CH-OH group of donors, NAD or NADP as receptor

K10B2.4  
 Unclassified  
*ani-2* (K10B2.5)  
 Biological process: gonad development; embryo development ending in birth or egg hatching; multicellular organism reproduction; oogenesis; reproduction; body morphogenesis; apoptotic process  
 Cellular component: cytoplasm

*clcc-88* (K10B2.3)  
 Molecular function: carbohydrate binding

K10B2.2  
 Biological process: proteolysis  
 Molecular function: serine-type carboxypeptidase activity

*lin-23* (K10B2.1)  
 Biological process: body morphogenesis; determination of adult lifespan; embryo development ending in birth or egg hatching; hermaphrodite genitalia development; locomotion; negative regulation of cell proliferation; nematode larval development; neuron projection morphogenesis; receptor-mediated endocytosis

Cellular component: cytoplasm; nucleus  
Molecular function: protein binding; protein dimerization activity  
F58F12.1  
Biological process: ATP synthesis coupled proton transport;  
embryo development ending in birth or egg hatching;  
nematode larval development; reproduction  
Cellular component: mitochondrion; proton-transport ATP synthase  
complex, catalytic core F(1)  
Molecular function: proton-transporting ATP synthase activity,  
rotational mechanism  
F58F12.4  
Unclassified  
F58F12.2  
Unclassified  
F58F12.3  
Unclassified  
*zig-10* (T25D10.2)  
Unclassified  
*btb-2* (T25D10.5)  
Molecular function: protein binding  
T25D10.1  
Unclassified  
*spp-11* (T25D10.3 – partial duplication)  
Unclassified

2. Chromosome IV:

7D: 505,050..701,113  
50D: 560,240..1,024,886  
Overlapping region: 560,240-701,113 = 140,874 bp  
30 protein-coding ORFs  
*efn-4* (F56A11.3)  
Biological process: cell migration involved in gastrulation; embryo  
development ending in birth or egg hatching;  
morphogenesis of embryonic epithelium; regulation of cell  
adhesion; reproduction; tail tip morphogenesis  
Cellular component: axon, membrane, neuronal cell body  
F56A11.7  
Unclassified  
F56A11.5  
Molecular function: catalytic activity; molybdenum ion binding;  
pyridoxal phosphate binding  
*gex-2* (F56A11.1)  
Biological process: axon guidance; body morphogenesis; dendrite  
development; embryo development; embryo development  
ending in birth or egg hatching; hermaphrodite genitalia

development; locomotion; nematode larval development;  
oviposition

Cellular component: cell junction; cytoplasm

F56A11.6  
Biological process: embryo development ending in birth or egg  
hatching

C18H7.12  
Unclassified

C18H7.5  
Unclassified

C18H7.6  
Unclassified

C18H7.4  
Biological process: protein phosphorylation  
Molecular function: protein binding; protein kinase activity;  
protein tyrosine kinase activity

C18H7.7  
Unclassified

C18H7.11  
Unclassified

*srt-59* (C18H7.8)  
Unclassified

*prmt-4* (C18H7.9)  
Unclassified

*col-102* (C18H7.3)  
Molecular function: structural constituent of cuticle

*inx-18* (C18H7.2)  
Cellular component: gap junction

C18H7.1  
Unclassified

*nhr-76* (C05G6.2)  
Biological process: regulation of transcription DNA-templated;  
steroid hormone mediated signaling pathway  
Cellular component: nucleus  
Molecular function: sequence-specific DNA binding; sequence-  
specific DNA binding transcription factor activity; steroid  
hormone receptor activity; zinc ion binding

K11H12.9  
Biological process: protein phosphorylation  
Molecular function: ATP binding; protein kinase activity

K11H12.1  
Unclassified

*rpl-15* (K11H12.2)  
Biological process: apoptotic process; embryo development ending  
in birth or egg hatching; molting cycle, collagen and  
cuticulin-based cuticle; nematode larval development;

positive regulation of multicellular organism growth;  
reproduction; translation

Cellular component: ribosome

Molecular function: structural constituent of ribosome

K11H12.8

Unclassified

K11H12.7

Unclassified

K11H12.6

Unclassified

K11H12.11

Unclassified

K11H12.3

Biological process: reproduction

K11H12.4

Unclassified

K11H12.10

Unclassified

K11H12.5

Unclassified

*cutl-28* (F41A4.1)

Biological process: blood coagulation; determination of adult  
lifespan; proteolysis

Cellular component: extracellular region

Molecular function: protein binding

*cutl-26* (Y55F3C.7 - partial duplication)

Unclassified

### 3. Chromosome V:

7B: 19,505,848..20,101,145

16B\*: 19,295,123..19,839,705

16D: 19,746,828..19,885,746

16E\*: 19,295,580..19,840,162

50A\*: 19,780,484..19,972,052

50B: 19,781,064..19,972,507

50C: 19,659,829..19,976,506

50D: 19,780,935 ..19,966,260

50E: 19,780,952..19,966,162

66C: 19,393,526..20,054,330

66E\*: 19,295,300..19,839,882

C2\*: 19,295,101..19,839,683

Overlapping region: 19,781,064-19,839,683 = 58,620 bp

11 protein-coding ORFs

*fbxa-118* (M162.8 – partial duplication)

Molecular function: protein-binding

*fbxa-194* (M162.11)

Molecular function: protein-binding  
*srt-45* (M162.3)  
 Unclassified  
*clec-258* (M162.2)  
 Molecular function: carbohydrate-binding  
*clec-259*  
 Molecular function: carbohydrate-binding  
 M162.7  
 Unclassified  
 Y116F11B.2  
 Unclassified  
*daf-28* (Y116F11B.1)  
 Biological processes: dauer larval development; determination of adult lifespan; regulation of insulin receptor signaling pathway; regulation of transcription factor import into nucleus  
 Cellular components: extracellular regions; extracellular space  
 Molecular functions: hormone activity; insulin receptor binding  
 Y116F11B.17  
 Unclassified  
*pcp-4* (Y116F11B.3)  
 Biological processes: proteolysis  
 Cellular components: membrane raft  
 Molecular functions: serine-type peptidase activity  
*srw-38* (Y116F11B.5)  
 Cellular components: integral component of membranes

### **Overlapping Deletions:**

#### 4. Chromosome X:

16A: 817,573..830,086

19A: 800,773..827,100

19E: 821,499..829,454

C5: 823,167..827,286

Overlapping region: 823,167-827,100= 3,934 bp

1 protein-coding ORFs

*daf-3* (F25E2.5 - partial deletion)

Biological process: dauer larval development; negative regulation of transcription from RNA polymerase II promoter; regulation of pharyngeal pumping; regulation of transcription, DNA-templated; transforming growth factor beta receptor signaling pathway

Cellular component: condensed chromosome; cytoplasm; intracellular; nucleus; transcription factor complex

Molecular function: enhancer sequence-specific DNA binding; sequence-specific DNA binding transcription factor activity

5. Chromosome V:

16D: 7,663,133..7,687,447

19C: 7,642,395..7,682,740

50B: 7,650,284..7,693,435

50C: 7,647,125..7,696,096

50D\*: 7,653,667..7,680,465

50E\*: 7,652,044..7,682,914

Overlapping region: 7,663,133-7,680,465= 17,333 bp

4 protein-coding ORFs

C12D5.5

Unclassified

C12D5.4

Unclassified

C12D5.3

Unclassified

*Cyp-33A1* (C12D5.7 - partial deletion)

Biological process: oxidation-reduction process

Molecular function: heme binding; iron ion binding;  
oxidoreductase activity, acting on donors, with  
incorporation or reduction of molecular oxygen

6. Chromosome X:

66D: 7,528,608..7,529,729

66E: 7,528,608..7,529,729

C3\*: 7,527,813..7,529,236

Overlapping region: 7,528,608-7,529,236= 629 bp

1 protein-coding ORFs

*ceh-14* (F46C8.5 - partial deletion)

Biological process: regulation of transcription, DNA-templated;  
thermosensory behaviour

Cellular component: nucleus

Molecular function: DNA binding; protein binding; sequence-  
specific DNA binding; sequence-specific DNA binding  
transcription factor activity; zinc ion binding

7. Chromosome I:

C1: 15,060,622..15,071,438

C2: 15,060,388..15,071,427

C4: 15,060,388..15,071,427

C5: 15,061,973..15,071,438

Overlapping region: 15,061,973..15,071,427= 9,455 bp

4 rRNA genes

*rrn-1.1* (F31C3.7)

*rrn-2.1* (F31C3.11)

*rrn-3.1* (F31C3.9)

*rrn-1.2* (F31C3.8)

8. Chromosome X:

50C: 1,029..273,082

50D: 1,029..295,671

Overlapping region: 1,029..273,082 = 272,054 bp

CE7X\_3.1

Unclassified

Y73B3A.1

Unclassified

Y73B3A.20

Unclassified

Y73B3A.18

Biological process: embryo development ending in birth or egg hatching, hermaphrodite genitalia development, reproduction

Y73B3A.3

Biological process: embryo development ending in birth or egg hatching

Y73B3A.4

Unclassified

*elk-2* (Y73B3A.5)

Biological process: embryo development ending in birth or egg hatching, hermaphrodite genitalia development, negative regulation of vulval development

*fbxa-221* (Y73B3A.15)

Molecular function: protein binding

*fbxa-222* (Y73B3A.22)

Molecular function: protein binding

*fbxa-16* (Y73B3A.14)

Unclassified

Y73B3A.13

Unclassified

Y73B3A.7

Unclassified

*cal-6* (Y73B3A.12)

Biological process: embryo development ending in birth or egg hatching, receptor-mediated endocytosis, reproduction

Molecular function: calcium-ion binding

Y73B3A.8

Unclassified

Y73B3A.11

Unclassified

Y73B3A.9

Unclassified

Y73B3A.10



Biological process: cellular protein metabolic process,  
 reproduction  
 Molecular function: ATP binding  
 T08D2.1  
 Biological process: locomotion, transport  
 Cellular component: integral component of membrane  
 T08D2.4  
 Molecular function: protein binding, zinc ion binding  
 T08D2.5  
 Unclassified  
 T08D2.6  
 Unclassified  
 T08D2.7  
 Biological process: protein phosphorylation  
 Molecular function: ATP binding, protein binding, protein kinase  
 activity, transferase activity, transferring phosphorus-containing  
 groups  
 T08D2.8  
 Molecular function: binding  
 Y73B3B.1  
 Molecular function: protein binding  
 Y73B3B.3  
 Unclassified  
*set-28* (Y73B3B.2)  
 Molecular function: protein binding  
 AC8.4  
 Unclassified  
 AC8.3  
 Unclassified  
 AC8.7  
 Unclassified  
 AC8.11  
 Unclassified  
 AC8.10  
 Unclassified  
 AC8.12  
 Unclassified  
*set-33* (Y108F1.3)  
 Biological process: embryo development ending in birth or egg  
 hatching, nematode larval development, RNA interference  
 Molecular function: protein binding  
*math-43* (Y108F1.4)  
 Unclassified  
 Y108F1.5 (partial deletion)  
 Molecular function: helicase activity, protein binding
